# Supplementary material
Source: PubMed Central journal article supplement (PMC1864980)
Supplement: 7601682s2.pdf [file 7601682s2.pdf]

# Supplementary Fig. 1

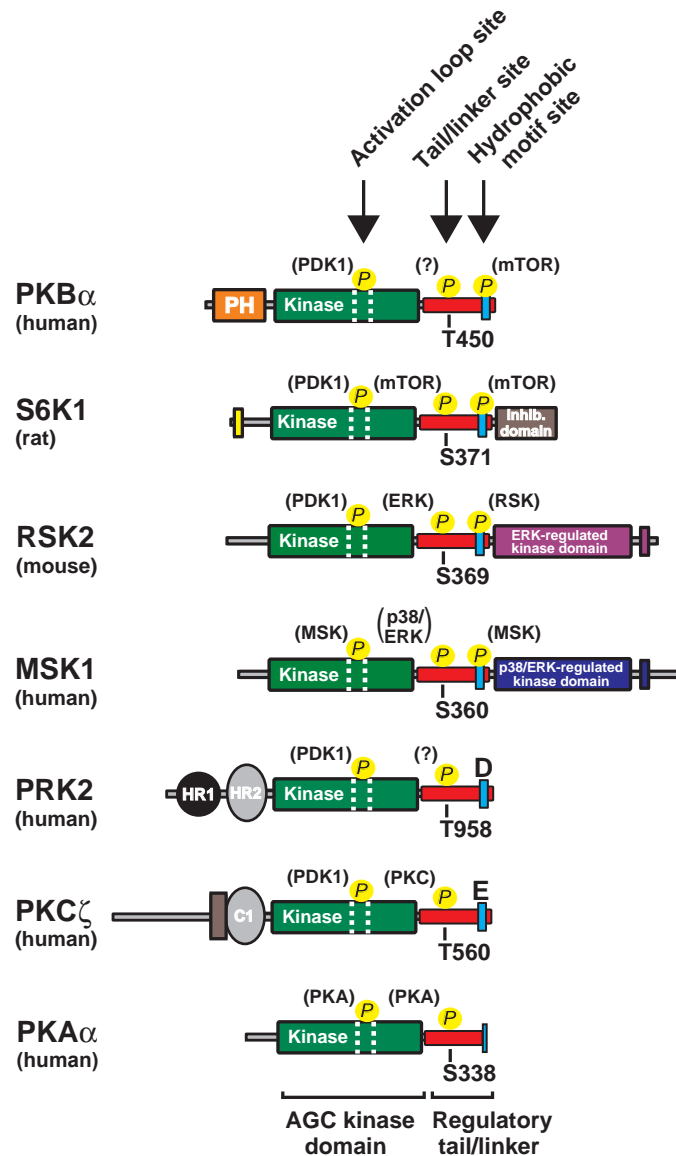

**Supplementary Fig. 1. Growth factor-activated AGC kinases contain three conserved phosphorylation sites required for full activation.** The growth factor-activated AGC kinases PKB, S6K, RSK, MSK, PRK and PKC contain three phosphorylation sites required for full activation: the activation loop site, the tail/linker site and the hydrophobic motif site (numbered according to the kinases used in the present study). PRK2 and some PKC family members, including PKC $\zeta$ , contain a phosphate-mimicking Asp or Glu residue at the hydrophobic motif site. PKA also has a phosphorylation site, named the turn motif site, in the tail region. The kinases thought to phosphorylate the conserved phosphorylation sites in the various AGC kinases are shown in the brackets.
