# Supplementary material
Source: PubMed Central journal article supplement (PMC1864980)
Supplement: 7601682s4.pdf [file 7601682s4.pdf]

# Supplementary Fig. 3

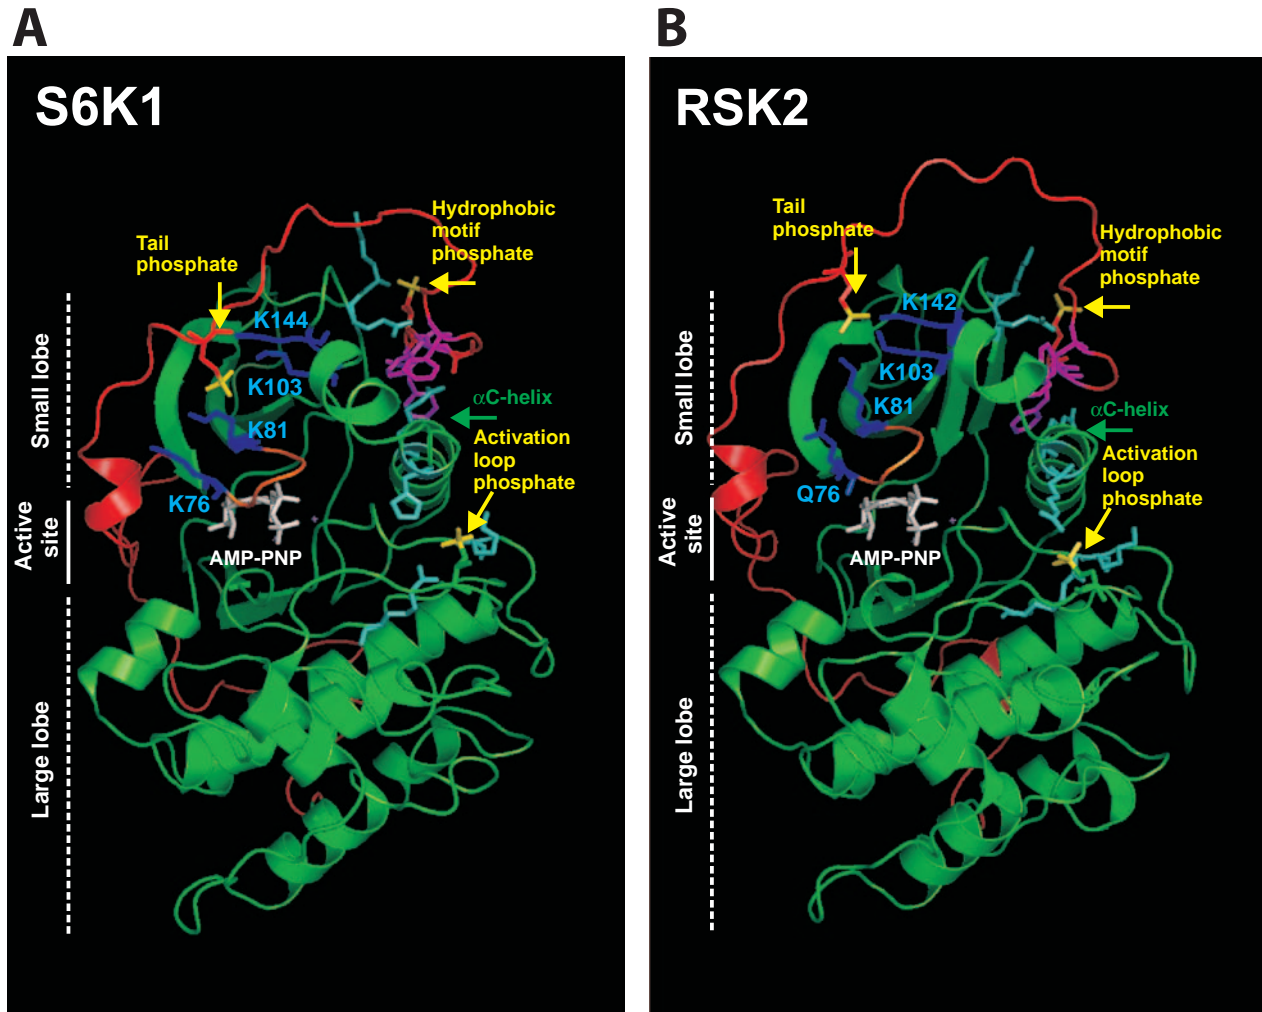

**Supplementary Fig. 3. Molecular modelling of S6K1 and RSK2 suggests a homologous binding site for the tail phosphoSer/Thr within the small lobe of the kinase domain.** The kinase domain and linker of S6K1 (A) and RSK2 (B) were modelled as described in Materials and Methods. Colour codes are as described in the legend to Fig. 1A.
