# Supplementary material
Source: PubMed Central journal article supplement (PMC1864980)
Supplement: 7601682s5.pdf [file 7601682s5.pdf]

# Supplementary Fig. 4

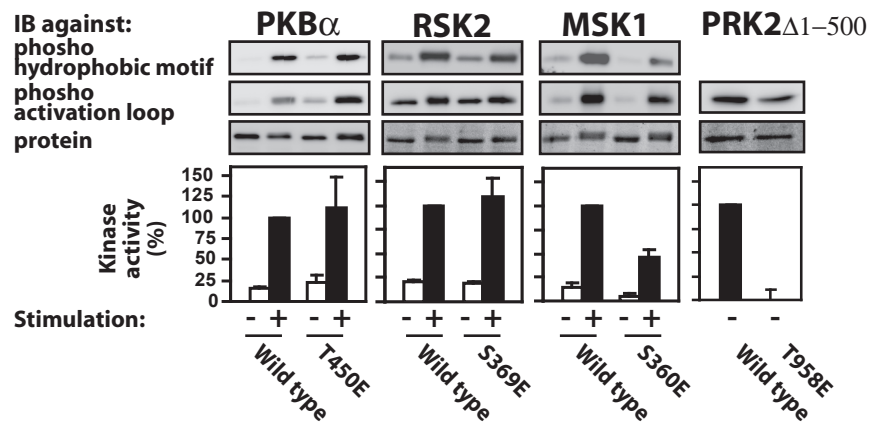

**Supplementary Fig. 4. Effect of mutation of the tail phosphorylation site to a glutamic acid residue.** The activity and phosphorylation state of wt and mutant PKB $\alpha$ , RSK2, MSK1, and PRK2 $\Delta 1-500$  expressed in COS7 cells were analyzed as described in the legend to Fig. 2. Experiments were repeated at least 3 times and activity data (expressed as percent) are means  $\pm$  SD.
