# Supplementary material
Source: PubMed Central journal article supplement (PMC1864980)
Supplement: 7601682s6.pdf [file 7601682s6.pdf]

# Supplementary Fig. 5

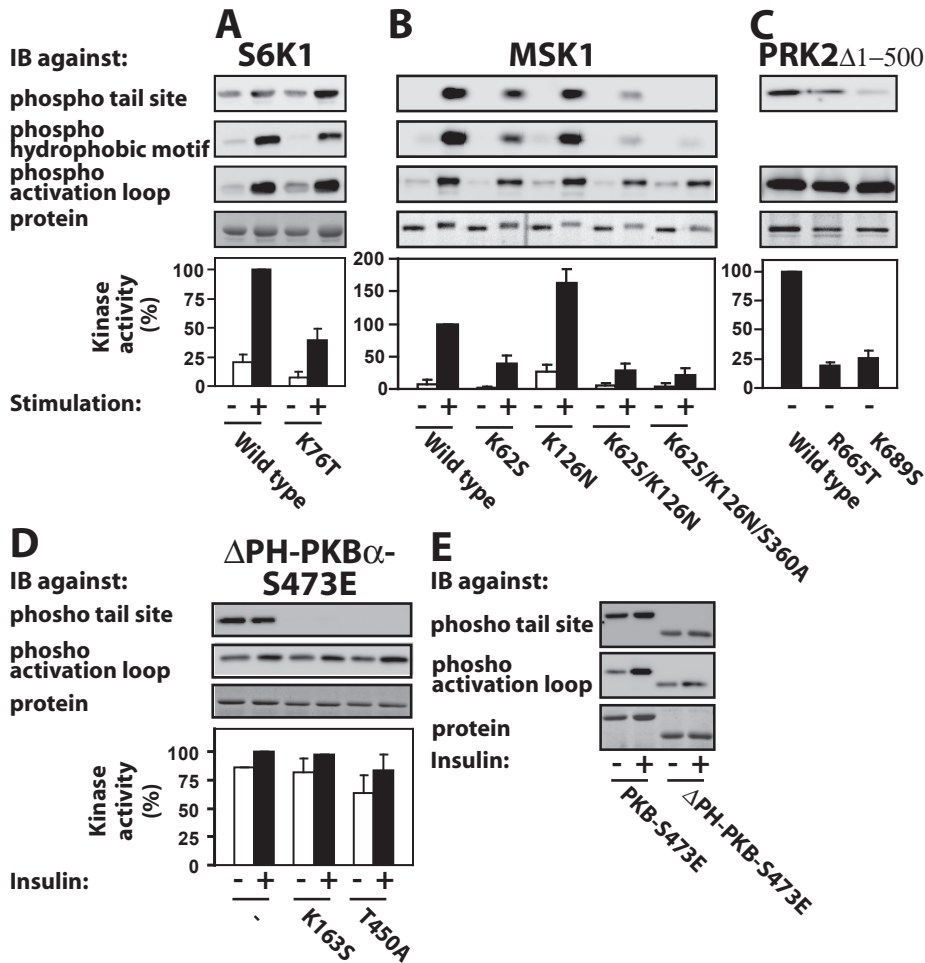

**Supplementary Fig. 5. Effect of various mutations in the tail phosphate-binding site on the activity and phosphorylation state of AGC kinases.** The activity and phosphorylation state of wt and mutant S6K1 (A), MSK1 (B), PRK2 $\Delta$ 1-500 (C), or  $\Delta$ PH-PKB $\alpha$ -S473E (D, E), expressed in COS7 cells were analyzed as described in the legend to Fig. 2. Experiments were repeated at least 3 times and activity data (expressed as percent) are means  $\pm$  SD.
