# Supplementary material
Source: PubMed Central journal article supplement (PMC1864980)
Supplement: 7601682s9.pdf [file 7601682s9.pdf]

# Supplementary Fig. 8

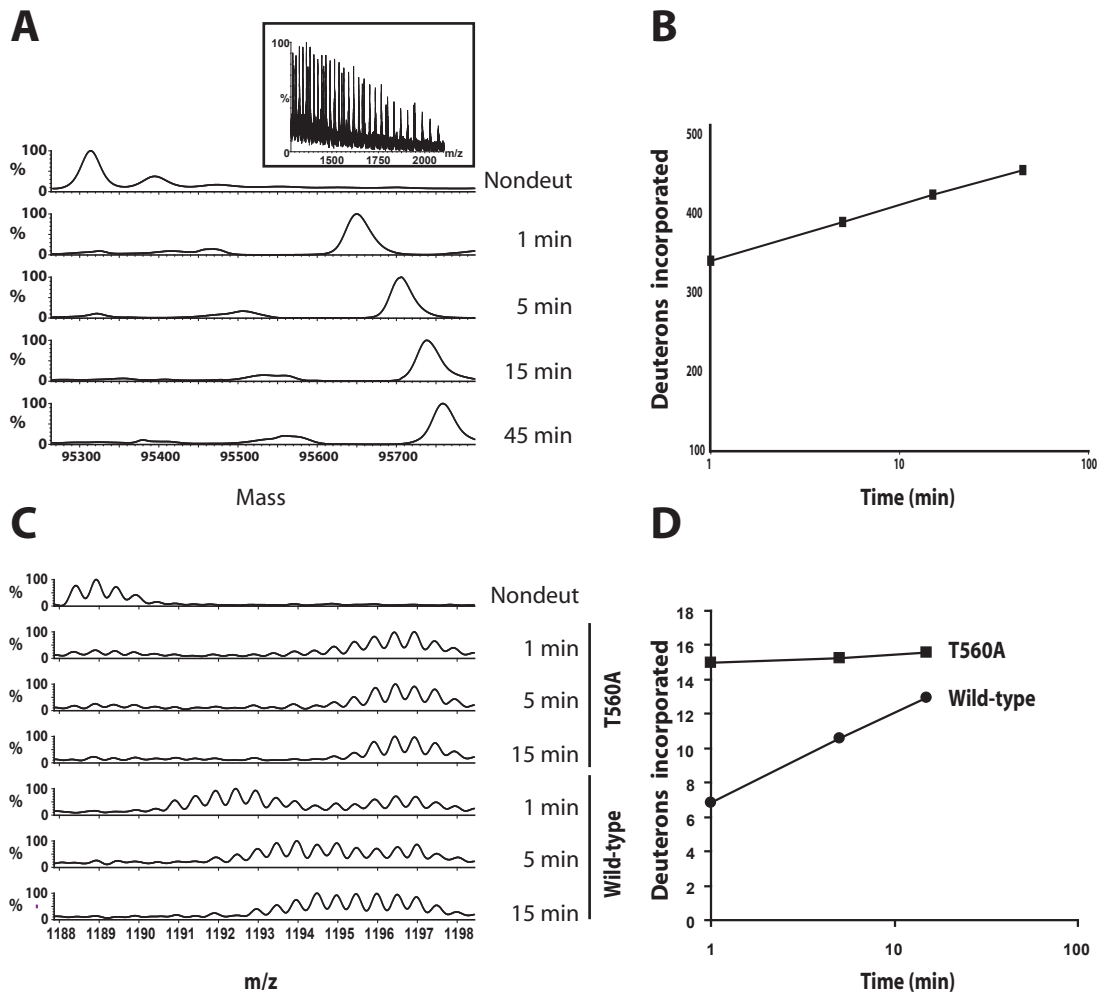

**Supplementary Fig 8. Amide hydrogen ( $^1\text{H}/^2\text{H}$ ) exchange of PKC $\zeta$  monitored by mass spectrometry. (A)** Global exchange analysis of wt PKC $\zeta$ . Deconvoluted spectra were obtained after 0, 1, 5, 15, and 45 min deuteration. The insert depicts the charge-state distribution of the intact non-deuterated protein. **(B)** Deuterium incorporation vs. exchange time for wt PKC $\zeta$ . **(C)** Local exchange analysis by pepsin digestion of labelled wt PKC $\zeta$  and PKC $\zeta$  T560A tail site mutant. Mass spectra are derived from peptide I294-L313. **(D)** Deuterium incorporation of peptide I294-L313 vs. exchange time.
